# Supplementary material for: Identification and Characterization of TALE Homeobox Genes in the Endangered Fern Vandenboschia speciosa
Source: MDPI journal article supplement (doi:10.3390/genes8100275), 2017-10-17
Supplement: s1 [file s1]

| Gene     | Forward                    | Reverse                    |
|----------|----------------------------|----------------------------|
| VsKNAT1  | 5' TCAAGCGAAATCAGAACACG 3' | 5' TATGCTGTAATGAGTCGCGG 3' |
| VsKNAT3  | 5' CAAGCCATTACAGCCTCCAT 3' | 5' GATCGATGCACAAATCAACG 3' |
| VsKNAT4  | 5' TCTTCTCCGTGGGATATGG 3'  | 5' CGTGATGAGCTCAAAATGGA 3' |
| VsKNAT6  | 5' CAGCAGAGCCACGTCATTTA 3' | 5' GGCGGAGCTAAGGAAGAAGT 3' |
| VsBELL4  | 5'CGTCGCTAACGAAAGAAATG 3'  | 5'AAGCTGAGCGTCACTCCATT 3'  |
| VsBELL6  | 5' TTGCTAATGTTGCCTGTTGC 3' | 5' CCCTTATGAAGCCCGTTAT 3'  |
| VsBELL10 | 5' TTCCTTCATCCGTACCCAAA 3' | 5' TGTCAACAGTGGACCTTTGA 3' |
| HKG-1    | 5' GCTACCGTCGGAGAAGACAG 3' | 5' CCAAAGCAGCACACACAGTT 3' |
| HKG-2    | 5' TGTGGCAATCACCTTCATA 3'  | 5' CAAGGGTTCAAGAGCGAGAG 3' |

**Table S1.** Sequence of the forward and reverse primers used in this work. HKG-1: Housekeeping Gene 1: Adenine phosphoribosyltransferase. HKG-2: Housekeeping Gene 2: Squalene synthase
