# Supplementary material for: Identification and Characterization of TALE Homeobox Genes in the Endangered Fern Vandenboschia speciosa
Source: MDPI journal article supplement (doi:10.3390/genes8100275), 2017-10-17
Supplement: s1 [file s1]

>*VsKNAT1*

GAGGTTTTCGGACGCCGAATCTCTTAGGGCTAAGATAATGGCGCATCCAAGCTTCCCGCGACTCA  
TTACAGCATACACGAATTGTCAAAAGGTTGGTGCACCGCCGGATGTTGTTACAAGGTTGGATAT  
ACGTTTACGAGCTGAGTAAAGATGGTCAGAACTTCGAACCCATGAAATCATCCAGCGCCGTA  
GGAGAAGACCGAGAGCTCGACGACTTCATGGACACGTACTGTGATGTGTTGCAAAAGTACCATG  
AGGAGCTGACAAGGCCCTTTAAGGAAGCCATGGCCTTCTTCAGAAAAATCGAATTGCAACTGAA  
CAGTCTTGGCAAAGGCAGCAGCTTAAGACTCTCTCAATCAGTAGATGAGAAAATGGATGCCAAT  
GGATCGTCCGACGAGGAGGATGGGGGTTGTGGTGAGCTAGACTACCACGACCTGGATCCGCTGG  
CGGAAGACCACAAAATCAAGGAGCTGCTTTTGCGAAAAGTATAGCGGGTACATCAGCTCACTGAA  
GCAAGAATTTTTGAAGAAGAAGAAAAAAGGAAAGCTACCGAAGGAAGCCAGGCAAAAACCTTCTG  
GACTGGTGGGGTGAGCACTACAAATGGCCGTATCCATCGGAGGCTGAAAAGGCAGCGCTGGCAG  
AGTCAACGGGCCTTGATCAGAAGCAGATAAATAACTGGTTCATCAACCAAGGAAGAGACATTG  
GAAACCTTCTGAAGATATGCAGTACGTAGTAGTCGAAAGTCCCAGTAGT

>*VsKNAT3*

CAAGTTGCAAAGTTTAAAGCGCAGATTTTGTACATCCTATGTACGAGCAGCTACTGGCAGAAC  
ACGTTGGGTGCTTGCATATAGCCACACCAGCGGATCATCTACAAACCATAGAAGCGCAACTTGC  
GACGATGCAGCATGTAGCAGCTAGGTATGCCGGCATGCTTGGCAATGACACGCCTCTTTCTCAG  
GACGAGAAGGAGGAGCTCGATCGCTTCATGGTAAGCTTCCTTCCAGTTGTTTTTCGCTTCCCTG  
TAGGTCATTACGTTTCAGCTCGCTGGAACATCAC

>*VsKNAT4*

GAAACAGCGAGACTGAAATCGGAAATAATAAATCATCCTTTATACGAGCACGTGCTAGAAAGCTC  
ACGTATCGTGCTTGTGCGTCGGTTTACCAATGGATTGCATTCAAGCCGTGGAGTCTCAGCTTGC  
TAACAGACACAGTGTGCGCATGAAGTATTGCATGCTGGGCAGAAACGAAGTTTTGGTGTTGGAC  
AGAAGCAAAGAGATAGATGAGTTTATGAAAAATTATTTGCTCCTGTTGCACTCGTTTAAAGAAGC  
ATTTGGAAGAGCATTTTGTCCAACCTATGAAAGAGGCAATGGAAGCATATATGGAAATCGAACA  
AACCTTTCAAGCATTTACAGGAGTGTCTTCCATAAATTTACCTACCACAAGCAAGGTGAACAAA  
GAACTCGAAGATGATCTTCTTCATGGCAATGATGATTTCACTATGGACATAAAGATGCACTCTG  
ACCAAGAGGATTCCTTATTGGAACAAGTTCGTGATGAGCTCAAAATGGAGTTGAAAGAGGAGTA  
TTTCAAAAGCATAGCCAATATTAGGAAGGAAATCTTGCGGAAAAGACAAGTAGGAAAGCTTCAA  
GGTGATACTGGTATTCTGAAACAATGGTGGAATGCTCATTTTCGATTGGCCATATCCCACGGAAG  
AAGATAAACAAAAAATGGTTGAAGCCACTGGTCTAGATCTCAAAACAAATCAACAATTGGTTTAT  
CAACCATCGTAAGAGAAATTGGAATGGGAGAGGTATTATTGATGGTGATACATTAAAAAGCTAT  
CCAAA

>*VsKNAT6*

GATTGCAAATGCACACTGCAAGAGACGTATTGTAATATTTTGCAGAAGTACTATGAGGAGCTTA  
CAAAGCCATTTAAGGAAGCTGTGACCTTCTTCAGGAAAATAGAGCTACAGTTAAACACACTTAG  
CAAAGGCAGCTTGACATTATCTCAAATAGAAAAAGAACTATCCCGAGTTTATCAAGTTACAAAA  
AATAGCCG

>*VsBEL4*

CTAGACGCCAAATTCTCTCACTCAGGCACCTTAGGTTTACTAAGGAATTCCAAGTATCTTCGAG  
CAGCACAGCAGGTTCTTGATGAATTCTGCCACGTTGGAAGGAGTGAGTTTATGAGCCTGCAGCC  
TAATCAGGCGGACCAAATATCTCAAGCGTGGATGAAAAGGGGATTACCCGAGTAGTTGAGGAT  
AAAATAGACGATCAAGCTATTCATCCAGAGTCATTAGACCAAAACAGATCTCCGGTATCCATCT  
CCGTGCGGCTTCCAATTGACACCAGAACCGAGCCCTATGCAATTGTCTGCAGATGAGAGGAGCCA  
TCTGCAGTTGAAGAAAGGGCGACTCATTGGAATGGTTGAGGAGCTGGACGGAAGATATAGACAA  
TACCGCGATCAAATGCAATTGGTAATCACTTCCTTTGAATCTGGTACTGGACTCGGTGCGGCTG  
CGCCCTACACAACCTTTGGCTCGGCAAGCTATGTCAAAGCGCTTTTCGGAGCTTGAGAGACTCGGT

AAGTGATCAGATACAGAAGGTGTGCAAAACACTTGGGGAGGAGCTATCGAACGTGCCGATACTG  
AACCGAGGAGAAACCCCTAGGCTGCGGGTTTTGGACCAGCGTTTACGGTACCAGAGAGCTTTGC  
AGCAAATCGGTATGCTACAGCAGCAGGCGTGGAGGCCTCAGCGAGGATTGCCGGAGCGATCTGT  
GTCTGTGCTCAGGGCTTGGCTGTTTTGAGCATTTCTTGACCCGTACCCCAAAGACTCAGAGAAA  
CTTATGCTTGCTCGGCTAACGGGCCTCTCGAGAAGCCAGTTTTCCAACGTGTTTCATAAACGCTC  
GAGTTCGACTCTGGAAACCCATGGTAGAGGAGATGTACGTTGAGGAG

>*VsBEL6*

TCCATGCTCGACAATGGAGTTGCTCTTGGCTTAGATAGCGACAATTCACATGGTGCTGCCAGCT  
CTCGTCAGGGCCTATCCCTCTCTCTTTACCACAGCAGCATCCAGTTCAAATGCAGTACTATAG  
CGTGCACCCCAATGATTCAAGCGTAAGCAGTTGTGCAGGATTAGCTCATGTCAACGCGGATCAG  
AACAACGAAACTAGGGGGGGGAGATTTCCAAGTAAATGGATAGGAAATTTGAGCCAATTCAGAG  
CATTATCTCGTGATGGCGTGCTGGCAACAGGTTTTCAGAATCCCATGAATGATACTAGCAGCAG  
GCATAGGCAACCGGATGCAAACGTTCCAACGCTAGTAGGTTTTGGAGGTCCTCTCTCTTGTTCG  
AAGTACTTGAAACCAGCACAGGAAGTTCTTGATGAAGTGGTGAGTGTCAACGTGGAATCAAAG  
GTAGTTCTCAAGGCATTTCGAAATTACCAGAGTCTTGATGGCATCTAGCTCTTTTTTAGATGG  
TGCTTTTGCAAGAGAGAGAAGTTTACCTGAGATTCTCAGTGTGCGAAAGAAGGAATATCCTGT  
ACAACGTCAATGCCAAGTGCTGCCTCTGGTCCCGTTCAATATTCTTCGAATGTGTCTGAGCTTT  
CACAACAAGGAAGGCAAGAATTTCAAATGAAGAAAGCAAAGCTGTTGGCAATGCTGGACGAGGT  
CGATCGGCGTTACAAGCAGTATTACGGTCAAATGCAAGTGGTTGTGCGATTCTTTTGAATCTGCG  
GCTGGACCTGGTGTTGCCAAAATGTATACATCCCTTGCTCTTCAAACATATCGAGGCATTTTC  
GCTCCTTGAGAGATGCAATCAGCAGTCAAATTCGTGTTGCAAGCGCAGCGCTCAATGAGGAAAA  
TCCCTCGTCTCCAGCGCTAGGGCGTGGAGAGGCATCGAGATTACGCTACGTGGACCAGCATTTTC  
CGCCAGCAACGAGCTCTGCAGCAGCTTGGAATGATGCAACAACCTAGCGTGGCGCCACAGAGGG  
GCCTCCCTGCATTTTTCGGTCTGGGTCTGTTGTTGTGTGTTTATTTTTGCATTTTCTTCTTGCGTA  
CCCAAAAGATGCAGACAAGATTATGCTGGCCAGACAGACCGGACTCACTCGAAATCAGGTTTTCA  
AACTGGTTTATCAATGCACGTGTACGACTTTGGAAACCCATGGTGGAAGAGATGTACTTGGAGG  
AG

>*VsBEL10*

CCAGGATTAGGTCATGTTGCTGTTGAAGACAGTGCTAATCGTGGAGAGAGAGCTCCAAGCAAGT  
GGATTGGGAGCTTAAGCCATTTAGAGCCTGTTACAGAGATGGCCTATTAGGATCAGGCTTTCA  
GAATTCACGAATGATATTAACAGCAGGCACATGCACATGGAATCAAATGTTTCAACAGTGGTA  
GGACCTGGAGGTCTTCTCACTGGTTCAAAGTACTTAAAAGCAGCGCAGCAGCTTCTTGACGAAG  
TTGTGAGTGTGTCACGAGTAGTTAAAAGCAGTTCTTCCAAACATTTGAAACTGCAGGCATGGAT  
GGCACCCTCAATTCATTTATGGATGGCTCGTTTGCAAGAAACGGAAGCCTACCTGAAGCGGTGCGC  
ACTGCGAAAGAGGGGACAGCTGGCACACATCAATTCCGAGCTTTGCTTCTGGTCTTGAACAGA  
ACTCTTCAACTGTTATTGAACTAACACGGGAGGAGCGACAGGAGCTTCAAACAAAGAAAGCAAA  
GCTGATTGCTATGCTTGACGAGGTGGATCGAAGGTACAAGCAATACTATAGTCAGATGGAAATG  
GTCGTGACTTCTTTGCAATCTGCAGCGGGACTTGGTGCTGCTAAGACGTACACCGCACTGGCTC  
TTCAGACAATATCAAGACATTTTCGTTGTCTGAGGGACGCTATTATCGGTCAAATTCGTGTGCG  
AAGCAGAGCGCTTGGTGAAGAAAATTTCTCATCTCCTTGTGTTGGGAAGGGGAGAGACACCTAGG  
CTACGTTATCTCGATCAGCAGTTGCGCCAGCAACGAGCACTCCAGCAGCTTGGAATGATGCAAC  
AACACGCCTGGCGTCTCAGAGGGGCCTCCCCGAGCGCTCTGTCTCAATTCTCAGAGCTTGGTT  
ATTTGAGCATTTCTTTCATCCGTACCCAAAAGACTCAGACAAGCTTACGCTGGCCAGACAAACG  
GGACTAACAAGAAACCAGGTTTCGAACGTGTTTATCAATGCGCGGGTACGGCTCTGGAACCGA  
TGTTTGAAGAAATGTACCTGGAAGAG
